# Supplementary material for: Polymeric Hole Transport Materials for Red CsPbI3 Perovskite Quantum-Dot Light-Emitting Diodes
Source: MDPI journal article supplement (doi:10.3390/polym13060896), 2021-03-15
Supplement: s1 [file s1]

## Supporting information

### Polymeric Hole Transport Materials for Red CsPbI<sub>3</sub> Perovskite

### Quantum-dot Light-emitting Diodes

Zong-Liang Tseng<sup>1\*</sup>, Shih-Hung Lin<sup>2</sup>, Jian-Fu Tang<sup>3</sup>, Yu-Ching Huang<sup>4</sup>, Hsiang-Chih Cheng<sup>5</sup>, Wei-Lun Huang<sup>1</sup>, Yi-Ting Lee<sup>6</sup> and Lung-Chien Chen<sup>5\*</sup>

<sup>1</sup>Department of Electronic Engineering and <sup>4</sup>Department of Materials Engineering, Ming Chi University of Technology, No. 84, Gungjuan Rd., New Taipei City 24301, Taiwan.

<sup>2</sup>Department of Electronic Engineering and <sup>3</sup>Bachelor Program in Interdisciplinary Studies, National Yunlin University of Science and Technology, Yunlin 64002, Taiwan.

<sup>5</sup>Department of Electro-optical Engineering, National Taipei University of Technology, 1, Sec.3, Chung-Hsiao E. Rd., Taipei 106, Taiwan.

<sup>6</sup>Center for Organic Photonics and Electronics Research (OPERA) Kyushu University 744 Motooka, Nishi, Fukuoka 819-0395, Japan.

\*Corresponding authors. E-mail:

[zltseeng@mail.mcut.edu.tw](mailto:zltseeng@mail.mcut.edu.tw) (Z. L. Tseng)

[ocean@ntut.edu.tw](mailto:ocean@ntut.edu.tw) (L. C. Chen)

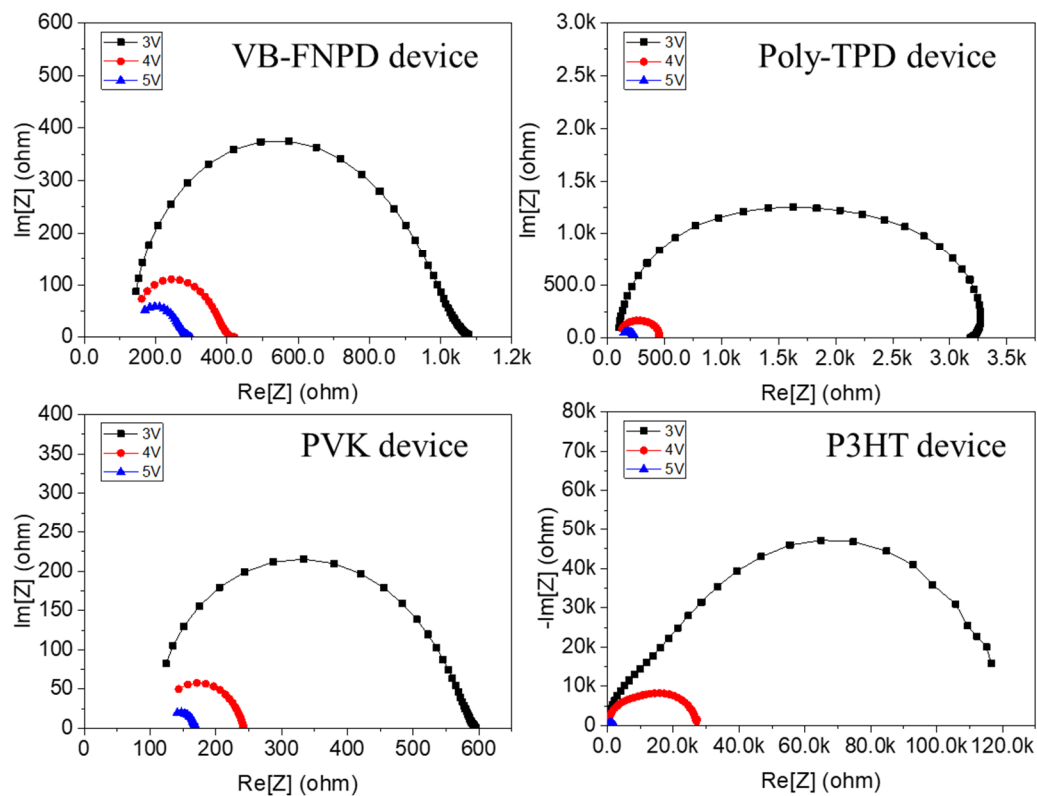

Figure S1 Impedance characteristics of IPQLED devices with different HTLs.
